# Supplementary material for: A novel somatic mutation in ACD induces telomere lengthening and apoptosis resistance in leukemia cells
Source: Springer Nature journal article supplement (doi:10.1186/s12885-015-1639-5), 2015-09-07
Supplement: MOESM1 [file 9745062]

# A novel somatic mutation in TPP1 induces telomere lengthening and apoptosis resistance in leukemia cells.

**Supplementary Table 1.** Non-synonymous and frame-shift mutations in TPP1 referenced in the public cancer database COSMIC version 71.

| CDS change       | Protein change | COSMIC v71 ID | Count | Class      | Domain |
|------------------|----------------|---------------|-------|------------|--------|
| c.79G>A          | p.G27R         | COSM3670197   | 1     | Missense   | -      |
| c.100C>T         | p.R34*         | COSM1519517   | 1     | Nonsense   | -      |
| c.125C>T         | p.A42V         | COSM4141846   | 1     | Missense   | -      |
| c.151C>T         | p.L51F         | COSM3511076   | 3     | Missense   | -      |
| c.154C>A         | p.L52I         | COSM972546    | 2     | Missense   | -      |
| c.167C>T         | p.P56L         | COSM3888782   | 1     | Missense   | -      |
| c.181C>T         | p.P61S         | COSM141471    | 2     | Missense   | -      |
| c.184C>T         | p.L62F         | COSM135719    | 2     | Missense   | -      |
| c.187C>T         | p.P63S         | COSM3888781   | 1     | Missense   | -      |
| c.188C>T         | p.P63L         | COSM3511075   | 1     | Missense   | -      |
| c.221A>G         | p.N74S         | COSM4061942   | 1     | Missense   | -      |
| c.229C>G         | p.P77A         | COSM1479001   | 1     | Missense   | -      |
| c.257G>T         | p.G86V         | COSM4061941   | 1     | Missense   | -      |
| c.283C>G         | p.L95V         | COSM119718    | 1     | Missense   | OB     |
| c.294G>A         | p.W98*         | COSM703839    | 1     | Nonsense   | OB     |
| c.335C>T         | p.P112L        | COSM3511074   | 1     | Missense   | OB     |
| c.505T>G         | p.F169V        | COSM3932389   | 1     | Missense   | OB     |
| c.559C>T         | p.H187Y        | COSM140768    | 1     | Missense   | OB     |
| c.562G>A         | p.V188I        | COSM972544    | 1     | Missense   | OB     |
| c.739G>A         | p.A247T        | COSM1302137   | 1     | Missense   | PBD    |
| c.794A>G         | p.Q265R        | COSM4061939   | 1     | Missense   | PBD    |
| c.865delC        | p.H289fs*30    | COSM972542    | 1     | Frameshift | PBD    |
| c.866A>G         | p.H289R        | COSM3370509   | 1     | Missense   | PBD    |
| c.1054C>A        | p.P352T        | COSM3511073   | 1     | Missense   | TPP1C  |
| c.1066C>A        | p.P356T        | COSM417319    | 1     | Missense   | TPP1C  |
| c.1096G>A        | p.G366S        | COSM4061938   | 1     | Missense   | TPP1C  |
| c.1109_1110CC>TT | p.S370F        | COSM143470    | 1     | Missense   | TPP1C  |
| c.1141C>T        | p.P381S        | COSM972540    | 1     | Missense   | TPP1C  |
| c.1208G>A        | p.C403Y        | COSM1378975   | 1     | Missense   | TPP1C  |
| c.1214C>T        | p.A405V        | COSM471951    | 1     | Missense   | TPP1C  |
| c.1231C>A        | p.P411T        | COSM349226    | 1     | Missense   | TPP1C  |
| c.1244A>C        | p.H415P        | COSM3932388   | 1     | Missense   | TPP1C  |
| c.1253G>A        | p.R418H        | COSM1378974   | 1     | Missense   | TPP1C  |
| c.1286C>T        | p.P429L        | COSM3511072   | 1     | Missense   | TPP1C  |
| c.1301G>A        | p.R434H        | COSM1740245   | 1     | Missense   | TPP1C  |
| c.1337C>T        | p.T446I        | COSM1749706   | 2     | Missense   | TPP1C  |
| c.1396C>T        | p.R466W        | COSM1378973   | 1     | Missense   | TPP1C  |
| c.1399C>T        | p.P467S        | COSM4061937   | 1     | Missense   | TPP1C  |
| c.1400C>T        | p.P467L        | COSM1378972   | 1     | Missense   | TPP1C  |
| c.1430G>A        | p.G477E        | COSM417320    | 1     | Missense   | TPP1C  |
| c.1455G>T        | p.W485C        | COSM4061936   | 1     | Missense   | TPP1C  |
| c.1474C>T        | p.R492C        | COSM1644358   | 1     | Missense   | TPP1C  |
| c.1603G>T        | p.G535W        | COSM972538    | 1     | Missense   | TPP1C  |

TPP1C: TIN2-binding domain; OB: oligonucleotide/oligosaccharide-binding; PBD: POT1 binding domain.
